# Supplementary material for: Heritable variation and small RNAs in the progeny of chimeras of Brassica juncea and Brassica oleracea
Source: PubMed Central journal article supplement (PMC3830474; doi:10.1093/jxb/ert266), 2013-09-04
Supplement: supp_ert266_jexbot097725_file001.pdf [file supp_ert266_jexbot097725_file001.pdf]

**Heritable variations and small RNAs in the progeny of the chimeras between  
*Brassica juncea* and *Brassica oleracea***

*Junxing Li, Yan Wang, Langlang Zhang, Bin Liu, Liwen Cao, Zhenyu Qi, and Liping  
Chen*

**Supplementary Data**

**Table S1** The identified sequences of sRNAs transmitted between the TTT and CCC lineages

| Sequences of sRNA (5'→3')   | Type  | TTT   | rTTT<br>(Code-reads) | CCC<br>(Code-reads) |
|-----------------------------|-------|-------|----------------------|---------------------|
| AAGGTACATGTGGAATGCGGTTA     | unann | ----- | t0000960-538         | t0002237-424        |
| AAAGGTACATGTGGAATGCGGTTG    | unann | ----- | t0001593-356         | t0033213-37         |
| AAAGGTACATGTGGAATGCGGTT     | unann | ----- | t0004339-157         | t0021041-57         |
| ATGCTGAGAACTGATAGCAAGC      | unann | ----- | t0005144-136         | t2420289-1          |
| TATGCTGAGAACTGATAGCAAGCT    | unann | ----- | t0006260-116         | t5483730-1          |
| AAGGTACATGTGGAATGCGGTTGC    | unann | ----- | t0006485-112         | t0124097-11         |
| ATGCTGAGAACTGATAGCAA        | unann | ----- | t0007053-104         | t0740978-2          |
| GTAAAGGTACATGTGGAATGCGGT    | siRNA | ----- | t0008369-90          | t0064305-20         |
| AAGGTACATGTGGAATGCGGTTG     | unann | ----- | t0009102-84          | t0025873-47         |
| TTTGGCTCTGTTTCCTTCTCT       | unann | ----- | t0010490-74          | t0071813-18         |
| TACATGTGGAATGCGGTTGCCTA     | unann | ----- | t0014780-56          | t0144381-10         |
| GTAAGAACTCAGGAAGAAGAACA     | unann | ----- | t0014890-55          | t0000963-882        |
| TGTAAAGGTACATGTGGAATGCGG    | unann | ----- | t0015927-52          | t0077017-17         |
| GCGGAAGATGTAACGGGGCTAAGCAG  | unann | ----- | t0017282-49          | t0118751-12         |
| AGTGAAATCGAGTAGGACGGA       | unann | ----- | t0017809-47          | t2650510-1          |
| CTCTATGCTGAGAACTGATAGCA     | unann | ----- | t0019905-43          | t1118869-2          |
| GTGCAATCTCGGGAGACAGACATC    | unann | ----- | t0020635-42          | t0027997-44         |
| ATACACGGCGTTAGATTTATATAA    | unann | ----- | t0020165-42          | t0784427-2          |
| AAAAGTAGTAACCATAACAAGTCCA   | unann | ----- | t0022027-39          | t0041261-30         |
| ACAGACATCAGAGACAAGGTTAAT    | unann | ----- | t0022843-38          | t0009445-119        |
| TATGCTGAGAACTGATAGCAA       | unann | ----- | t0023115-38          | t5178547-1          |
| AAGTGAAATCGAGTAGGACGGA      | unann | ----- | t0026741-33          | t0957925-2          |
| GGGGGACGGACTGGGAACGGCTCTTTC | unann | ----- | t0027657-32          | t0009118-123        |
| AGGAGAATAGACGATGATTGGTAT    | unann | ----- | t0028004-32          | t0062501-21         |
| ATCGGTTACTCTGTTTCAGAAGAT    | siRNA | ----- | t0027573-32          | t0102285-13         |
| AGTGAAATCGAGTAGGACGG        | unann | ----- | t0027394-32          | t1964653-1          |
| ACTGGACCAAGAAGTATTAGGGCT    | unann | ----- | t0029138-31          | t1290252-2          |
| ACGTGGCAACGGTAGTGTGAATA     | unann | ----- | t0028814-31          | t4280190-1          |
| ATGTGGAATGCGGTTGCCTAGATA    | unann | ----- | t0030271-30          | t5747995-1          |
| GGACGGACTGGGAACGGCTCTT      | unann | ----- | t0032365-28          | t0002627-372        |
| AAGATGTAACGGGGCTCAAGCGGT    | unann | ----- | t0032523-28          | t0609299-3          |
| GCAATCTCGGGAGACAGACATC      | unann | ----- | t0034661-26          | t0057436-22         |
| GCTGAGAACTGATAGCAAGCT       | unann | ----- | t0036719-25          | t3200630-1          |
| AAAGGTACATGTGGAATGCGGTTA    | unann | ----- | t0038979-24          | t0127361-11         |
| TTAAGTGGGAAACGATGTG         | unann | ----- | t0039511-24          | t0688133-3          |
| AATCTCGGGAGACAGACATC        | unann | ----- | t0038576-24          | t1005291-2          |
| CGGGGACGGACTGGGAACGGCTCTTT  | unann | ----- | t0041281-23          | t0013657-85         |
| TCGTGTCCCGGCGACGGAGCCA      | unann | ----- | t0041164-23          | t5423306-1          |

|                             |       |       |             |             |
|-----------------------------|-------|-------|-------------|-------------|
| AGTAACTCAGCTGAATTGTGGACA    | unann | ----- | t0042093-22 | t0025670-47 |
| TTAATGCCGAGAACTGATGACGATCCT | unann | ----- | t0041578-22 | t1399293-1  |
| TTTAGGTAGCGCCTCGGACG        | unann | ----- | t0045590-21 | t5219285-1  |
| AAAGACAAACAGAGCGACAAAGAA    | unann | ----- | t0046669-20 | t0032140-38 |
| AGGTACATGTGGAATGCGGTTA      | unann | ----- | t0046916-20 | t0046444-27 |
| CAATCTCGGGAGACAGACATC       | unann | ----- | t0046674-20 | t0060669-21 |
| AACAGACCGGCAAACACTCAGCAT    | unann | ----- | t0046729-20 | t0171980-8  |
| ATGTAGCGACTGGTGTATGATTTC    | unann | ----- | t0048460-20 | t0439762-4  |
| GAGACTAGAACTCATAAGGAAGAA    | unann | ----- | t0046996-20 | t0899181-2  |
| AAGTCAAATCGAGTAGGACGG       | unann | ----- | t0047021-20 | t2981912-1  |
| TGAAGCGGTGGAGGCGTCTGTTA     | unann | ----- | t0046366-20 | t1792853-1  |
| ATCATGCGATCTCTTTGGATT       | miRNA | ----- | t0143145-8  | t4900520-1  |
| AGTAGCCAAGGATGACTTGCCTG     | miRNA | ----- | t0241371-5  | t0095499-14 |
| TTGACAGAAGATAGAGAGCACAGA    | miRNA | ----- | t0247812-5  | t4164689-1  |
| GCTCACTGCTCTTTCTGTCAGAT     | miRNA | ----- | t0369298-4  | t0339552-5  |
| GACAGAAGAAAGAGAGCAC         | miRNA | ----- | tt0827890-2 | t3583171-1  |
| TCAATAAAGCTGTGGGAAGATA      | miRNA | ----- | t0856757-2  | t3827040-1  |
| TGATTGAGCCGTGTCAATATC       | miRNA | ----- | t1797662-1  | t0790631-2  |
| TGACAGAAGAAAGAGAGCACA       | miRNA | ----- | t3631105-1  | t0043530-29 |
| GGTGACAGAAGAGAGTGAGCA       | miRNA | ----- | t4425956-1  | t1203125-2  |

-----stands for sRNAs not observed in TTT

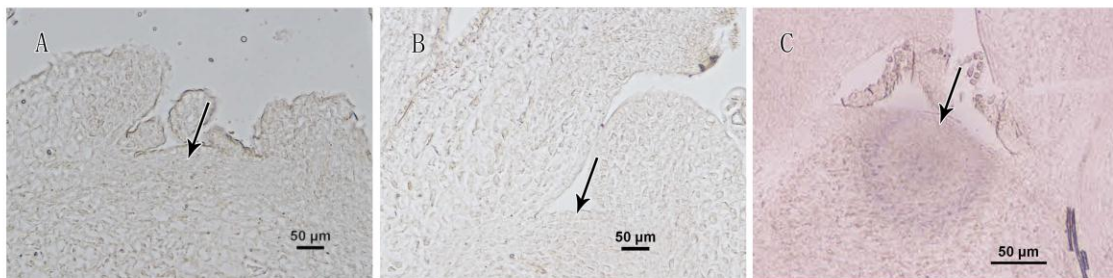

Fig. S1 The control hybridization. A, B and C: The whole SAM of tuber mustard, red cabbage and one chimera was respectively hybridized without containing probes in hybridization mixture. Bar=50µm, the arrows indicate the SAM.
